# Supplementary material
Source: publisher figshare collection journal article supplement (https://frontiersin.figshare.com/ndownloader/files/12109436)
Supplement: Supplementary file [file 12109436]

| Uniprot Accession number | Description                                    | Pfam      | Comparison                  | -Log Student's T-test p-value | Student's T-test Test statistic |
|--------------------------|------------------------------------------------|-----------|-----------------------------|-------------------------------|---------------------------------|
| A0A088A4K9               | OBP14                                          | PBP_GOBP  | nurses-old workers          | 2.72                          | 4.84                            |
| A0A088ABV3               | Glutathione S-transferase                      | GST_C     | guards-2 <sup>nd</sup> week | 4.10                          | 16.52                           |
| A0A088AVD8               | peroxisomal multifunctional enzyme type 2-like | adh_short | guards-2 <sup>nd</sup> week | 2.66                          | 6.99                            |

**Supplementary Table S5.** Soluble olfactory proteins differentially expressed in groups of workers (Student t-test Benjamini Hochberg-corrected FDR=5%).
